# Supplementary material for: Global Trends in Alcohol Control Policies Between 2010–2019
Source: Research Square preprint supplement (doi:10.21203/rs.3.rs-8311355/v1), 2025-12-23
Supplement: Supplementary file 1 [file f195c3e922a4610ab1f3ce65.pdf]

## **Appendix: Global Trends in Alcohol Control Policies Between 2010–2019**

Hyundam Gu, Eduardo Fuentes-López, Francisco Idalsoaga, David Marti-Aguado, Patrick S. Kamath, Ashwani K. Singal, Ramon Bataller, Marco Arrese, Jeffrey V. Lazarus, Frank Murray, Juan Pablo Arab, Luis Antonio Díaz

### **Table of Contents:**

| <b>Content</b>         | <b>Page</b> |
|------------------------|-------------|
| Supplementary Table 1  | 2           |
| Supplementary Table 2  | 3           |
| Supplementary Table 3  | 5           |
| Supplementary Table 4  | 13          |
| Supplementary Table 5  | 18          |
| Supplementary Figure 1 | 19          |
| Supplementary Figure 2 | 20          |
| Supplementary Figure 3 | 21          |
| Supplementary Figure 4 | 22          |

**Supplementary Table 1.** Countries excluded due to a lack of available data in 2019

| WHO Region | Country                |
|------------|------------------------|
| AFR        | Algeria                |
| AFR        | Cameroon               |
| AFR        | Comoros                |
| AFR        | Equatorial Guinea      |
| AFR        | Eritrea                |
| AFR        | Gabon                  |
| AFR        | Gambia                 |
| AFR        | Guinea-Bissau          |
| AFR        | Lesotho                |
| AFR        | Madagascar             |
| AFR        | Malawi                 |
| AFR        | Mauritania             |
| AFR        | Mauritius              |
| AFR        | Namibia                |
| AFR        | Niger                  |
| AFR        | Togo                   |
| AMR        | Haiti                  |
| AMR        | Trinidad and Tobago    |
| AMR        | Venezuela              |
| EMR        | Libya                  |
| EMR        | Yemen                  |
| EUR        | Albania                |
| EUR        | Bosnia and Herzegovina |
| EUR        | Montenegro             |
| EUR        | Uzbekistan             |
| SEAR       | Timor-Leste            |
| WPR        | Kiribati               |
| WPR        | Niue                   |

**Abbreviations:** AFR; African Region, AMR; Region of the Americas, EMR; Eastern Mediterranean Region, EUR; European Region, SEAR;

**Supplementary Table 2.** 5-item instrument to assess the strength of alcohol-related public health policies in API.

| Item                                                                   | World Health Organization categories                                                                                                             | Low level (0 point)                                                                                                                              | Moderate level (1 point)                                                                                                                                                            | Strong level (2 point)                                                                                                                                                                     |
|------------------------------------------------------------------------|--------------------------------------------------------------------------------------------------------------------------------------------------|--------------------------------------------------------------------------------------------------------------------------------------------------|-------------------------------------------------------------------------------------------------------------------------------------------------------------------------------------|--------------------------------------------------------------------------------------------------------------------------------------------------------------------------------------------|
| 1. National policy to fight harmful consequences of alcohol            | National plan                                                                                                                                    | Countries that do not have a written national policy                                                                                             | Countries that adopted a written national policy without an action plan for its implementation                                                                                      | Countries that have a national action plan for the implementation of the written national policy on alcohol                                                                                |
| 2. Control over production, pricing and taxes                          | Taxes control, pricing policies or national license, production and selling control                                                              | Countries that do not have taxes controls or do not control licensing                                                                            | Countries with some regulations on alcohol production, licensing, or selling. There are taxes, but they are not established for all alcoholic beverages                             | Countries with strong regulations on alcohol production, licensing, and selling. There are taxes on all alcoholic beverages                                                                |
| 3. Marketing of alcoholic beverages and restrictions to alcohol access | Control over advertising and promotion, restrictions to alcohol access or national legal minimum age for on-premise sales of alcoholic beverages | Countries without control over ads, restrictions to alcohol access, or a national legal minimum age for on-premises sales of alcoholic beverages | Countries with less than 50% of policies in control over ads and restrictions on alcohol access. There is a national legal minimum age for on-premises sales of alcoholic beverages | Countries with at least 50% of policies in control over advertising and restrictions on alcohol access. There is a national legal minimum age for on-premises sales of alcoholic beverages |
| 4. Drink- driving policies and countermeasures                         | Driving- related policies                                                                                                                        | Countries without established restrictions on blood alcohol concentration                                                                        | Countries with established restrictions on blood alcohol concentration                                                                                                              | Countries that have zero tolerance to alcohol consumption when                                                                                                                             |

|                                |                    |                                                                               |                                                                                                |                                                                                                 |
|--------------------------------|--------------------|-------------------------------------------------------------------------------|------------------------------------------------------------------------------------------------|-------------------------------------------------------------------------------------------------|
|                                |                    | when driving a vehicle or effective penalties for drink driving               | when driving a vehicle or effective penalties for drink driving                                | driving a vehicle and effective penalties for drink driving                                     |
| 5. Monitoring and surveillance | Monitoring systems | Countries that do not meet the definitions for the moderate- or strong- level | Countries with national government support for community action or national monitoring systems | Countries with national government support for community action and national monitoring systems |

**Supplementary Table 3.** Public health policies enforced in 2010-2016-2019 and the score per each item of the instrument.

|                                  |            | 2010   |        |        |        |        | 2016   |        |        |        |        | 2019   |        |        |        |        |
|----------------------------------|------------|--------|--------|--------|--------|--------|--------|--------|--------|--------|--------|--------|--------|--------|--------|--------|
| Country                          | WHO region | Item 1 | Item 2 | Item 3 | Item 4 | Item 5 | Item 1 | Item 2 | Item 3 | Item 4 | Item 5 | Item 1 | Item 2 | Item 3 | Item 4 | Item 5 |
| Angola                           | AFR        | 0      | 1      | 0      | 1      | 1      | 2      | 1      | 0      | 1      | 1      | 1      | 2      | 1      | 1      | 1      |
| Benin                            | AFR        | 0      | 1      | 0      | 1      | 1      | 2      | 0      | 0      | 1      | 1      | 1      | 2      | 0      | 1      | 1      |
| Botswana                         | AFR        | 1      | 1      | 1      | 1      | 2      | 1      | 1      | 2      | 1      | 1      | 1      | 2      | 2      | 0      | 2      |
| Burkina Faso                     | AFR        | 0      | 0      | 0      | 0      | 0      | 0      | 2      | 0      | 1      | 1      | 0      | 2      | 0      | 1      | 1      |
| Burundi                          | AFR        | 0      | 1      | 0      | 0      | 0      | 0      | 2      | 1      | 0      | 1      | 1      | 2      | 1      | 0      | 1      |
| Cabo Verde                       | AFR        | 0      | 1      | 1      | 0      | 0      | 2      | 1      | 1      | 1      | 1      | 2      | 2      | 1      | 1      | 1      |
| Central African Republic         | AFR        | 0      | 2      | 0      | 1      | 0      | 2      | 1      | 0      | 1      | 0      | 1      | 0      | 0      | 1      | 0      |
| Chad                             | AFR        | 0      | 1      | 0      | 0      | 1      | 0      | 0      | 1      | 1      | 1      | 1      | 2      | 1      | 1      | 1      |
| Congo                            | AFR        | 1      | 1      | 0      | 1      | 1      | 0      | 2      | 0      | 1      | 0      | 0      | 2      | 1      | 1      | 0      |
| Côte d'Ivoire                    | AFR        | 1      | 1      | 0      | 1      | 0      | 2      | 2      | 1      | 0      | 1      | 2      | 2      | 1      | 0      | 2      |
| Democratic Republic of the Congo | AFR        | 1      | 1      | 1      | 1      | 0      | 1      | 1      | 1      | 1      | 0      | 1      | 2      | 1      | 1      | 0      |
| Ethiopia                         | AFR        | 0      | 1      | 0      | 1      | 0      | 0      | 1      | 1      | 1      | 1      | 0      | 2      | 1      | 1      | 1      |
| Ghana                            | AFR        | 0      | 1      | 0      | 1      | 2      | 2      | 1      | 1      | 1      | 1      | 2      | 2      | 1      | 1      | 1      |
| Guinea                           | AFR        | 0      | 1      | 0      | 1      | 0      | 0      | 2      | 0      | 1      | 0      | 0      | 0      | 0      | 1      | 0      |
| Kenya                            | AFR        | 2      | 2      | 2      | 0      | 1      | 0      | 2      | 2      | 1      | 1      | 0      | 2      | 2      | 1      | 1      |
| Liberia                          | AFR        | 0      | 2      | 0      | 1      | 0      | 0      | 2      | 0      | 0      | 0      | 0      | 2      | 1      | 0      | 0      |
| Mali                             | AFR        | 0      | 0      | 0      | 1      | 1      | 0      | 0      | 0      | 1      | 0      | 0      | 0      | 0      | 1      | 0      |

|                             |     |   |   |   |   |   |   |   |   |   |   |   |   |   |   |   |
|-----------------------------|-----|---|---|---|---|---|---|---|---|---|---|---|---|---|---|---|
| Mozambique                  | AFR | 0 | 2 | 0 | 1 | 1 | 0 | 2 | 1 | 1 | 1 | 0 | 2 | 2 | 1 | 1 |
| Nigeria                     | AFR | 0 | 1 | 1 | 1 | 1 | 0 | 2 | 1 | 1 | 1 | 0 | 2 | 1 | 1 | 1 |
| Rwanda                      | AFR | 0 | 2 | 0 | 1 | 0 | 0 | 0 | 0 | 1 | 1 | 0 | 0 | 1 | 1 | 2 |
| Sao Tome and Principe       | AFR | 0 | 0 | 0 | 0 | 0 | 1 | 0 | 0 | 0 | 0 | 0 | 0 | 0 | 0 | 0 |
| Senegal                     | AFR | 0 | 1 | 2 | 2 | 0 | 0 | 2 | 2 | 0 | 1 | 0 | 0 | 2 | 0 | 1 |
| Seychelles                  | AFR | 2 | 1 | 0 | 1 | 1 | 1 | 1 | 2 | 1 | 1 | 0 | 2 | 2 | 1 | 1 |
| Sierra Leone                | AFR | 0 | 1 | 0 | 0 | 1 | 0 | 1 | 0 | 0 | 1 | 0 | 2 | 0 | 0 | 1 |
| South Africa                | AFR | 2 | 1 | 1 | 1 | 1 | 2 | 1 | 0 | 1 | 0 | 2 | 2 | 1 | 0 | 0 |
| Uganda                      | AFR | 0 | 1 | 0 | 1 | 2 | 0 | 1 | 0 | 1 | 0 | 1 | 2 | 0 | 1 | 0 |
| United Republic of Tanzania | AFR | 0 | 1 | 1 | 1 | 0 | 0 | 2 | 1 | 1 | 0 | 1 | 2 | 1 | 1 | 0 |
| Zambia                      | AFR | 0 | 1 | 1 | 1 | 1 | 0 | 1 | 1 | 1 | 1 | 1 | 2 | 1 | 1 | 1 |
| Zimbabwe                    | AFR | 0 | 2 | 2 | 1 | 1 | 0 | 2 | 1 | 1 | 1 | 0 | 2 | 1 | 0 | 1 |
| Antigua and Barbuda         | AMR | 0 | 0 | 0 | 0 | 1 | 0 | 0 | 0 | 0 | 1 | 0 | 0 | 1 | 1 | 1 |
| Argentina                   | AMR | 2 | 0 | 1 | 1 | 2 | 1 | 0 | 0 | 1 | 1 | 2 | 1 | 1 | 1 | 2 |
| Bahamas                     | AMR | 1 | 1 | 2 | 1 | 2 | 1 | 1 | 2 | 1 | 1 | 1 | 2 | 1 | 1 | 2 |
| Barbados                    | AMR | 0 | 1 | 0 | 0 | 1 | 0 | 1 | 0 | 0 | 1 | 0 | 2 | 1 | 0 | 2 |
| Belize                      | AMR | 0 | 0 | 0 | 1 | 1 | 0 | 1 | 0 | 1 | 1 |   | 2 | 1 | 1 | 1 |
| Bolivia                     | AMR | 0 | 1 | 0 | 0 | 0 | 0 | 0 | 1 | 0 | 0 | 0 | 0 | 1 | 0 | 0 |
| Brazil                      | AMR | 2 | 1 | 1 | 1 | 2 | 1 | 1 | 2 | 2 | 1 | 2 | 2 | 2 | 0 | 2 |
| Canada                      | AMR | 0 | 2 | 1 | 2 | 2 | 1 | 2 | 2 | 1 | 1 | 0 | 2 | 2 | 1 | 2 |

|                       |     |   |   |   |   |   |   |   |   |   |   |   |   |   |   |   |
|-----------------------|-----|---|---|---|---|---|---|---|---|---|---|---|---|---|---|---|
| Chile                 | AMR | 2 | 1 | 0 | 1 | 1 | 1 | 1 | 1 | 1 | 1 | 1 | 2 | 2 | 1 | 1 |
| Colombia              | AMR | 2 | 2 | 1 | 1 | 2 | 2 | 2 | 0 | 1 | 1 | 2 | 2 | 1 | 1 | 2 |
| Costa Rica            | AMR | 0 | 2 | 2 | 1 | 2 | 0 | 1 | 2 | 1 | 1 | 1 | 2 | 2 | 1 | 2 |
| Cuba                  | AMR | 2 | 0 | 2 | 1 | 2 | 0 | 0 | 0 | 1 | 1 | 0 | 0 | 1 | 1 | 2 |
| Dominica              | AMR | 0 | 1 | 0 | 0 | 1 | 0 | 1 | 0 | 0 | 1 | 0 | 2 | 1 | 0 | 1 |
| Dominican Republic    | AMR | 0 | 1 | 1 | 1 | 1 | 0 | 1 | 1 | 1 | 1 | 0 | 2 | 1 | 1 | 2 |
| Ecuador               | AMR | 0 | 1 | 2 | 1 | 0 | 0 | 1 | 2 | 1 | 1 | 0 | 2 | 2 | 1 | 2 |
| El Salvador           | AMR | 0 | 2 | 0 | 1 | 1 | 0 | 1 | 1 | 1 | 1 | 0 | 2 | 1 | 1 | 2 |
| Grenada               | AMR | 0 | 0 | 0 | 0 | 2 | 0 | 1 | 0 | 0 | 1 | 0 | 2 | 1 | 0 | 2 |
| Guatemala             | AMR | 0 | 0 | 1 | 0 | 1 | 0 | 1 | 0 | 0 | 1 | 1 | 2 | 1 | 0 | 1 |
| Guyana                | AMR | 0 | 1 | 0 | 1 | 2 | 0 | 1 | 0 | 1 | 1 | 0 | 2 | 1 | 0 | 1 |
| Honduras              | AMR | 0 | 2 | 1 | 1 | 1 | 0 | 1 | 1 | 1 | 1 | 0 | 2 | 1 | 1 | 1 |
| Jamaica               | AMR | 0 | 1 | 1 | 1 | 1 | 0 | 1 | 1 | 1 | 1 | 0 | 2 | 1 | 1 | 2 |
| Mexico                | AMR | 2 | 1 | 2 | 1 | 2 | 2 | 1 | 1 | 1 | 1 | 1 | 2 | 1 | 0 | 2 |
| Nicaragua             | AMR | 0 | 1 | 2 | 1 | 2 | 0 | 1 | 0 | 1 | 1 | 1 | 2 | 1 | 1 | 2 |
| Panama                | AMR | 0 | 1 | 0 | 1 | 1 | 0 | 1 | 2 | 1 | 1 | 0 | 2 | 1 | 1 | 2 |
| Paraguay              | AMR | 1 | 0 | 0 | 0 | 1 | 1 | 1 | 0 | 2 | 1 | 1 | 2 | 1 | 2 | 2 |
| Peru                  | AMR | 0 | 1 | 2 | 1 | 1 | 0 | 1 | 1 | 1 | 1 | 0 | 2 | 1 | 1 | 2 |
| Saint Kitts and Nevis | AMR | 0 | 1 | 0 | 1 | 1 | 0 | 1 | 0 | 1 | 1 | 0 | 2 | 0 | 1 | 1 |
| Saint Lucia           | AMR | 0 | 1 | 0 | 1 | 1 | 0 | 1 | 0 | 1 | 1 | 1 | 2 | 1 | 1 | 2 |
| Saint Vincent and     | AMR | 0 | 1 | 1 | 0 | 0 | 0 | 1 | 0 | 0 | 0 | 0 | 0 | 1 | 0 | 0 |

|                          |     |   |   |   |   |   |   |   |   |   |   |   |   |   |   |   |
|--------------------------|-----|---|---|---|---|---|---|---|---|---|---|---|---|---|---|---|
| the Grenadines           |     |   |   |   |   |   |   |   |   |   |   |   |   |   |   |   |
| Suriname                 | AMR | 0 | 1 | 0 | 1 | 1 | 1 | 1 | 0 | 1 | 1 | 0 | 2 | 0 | 1 | 1 |
| United States of America | AMR | 2 | 1 | 1 | 1 | 2 | 2 | 2 | 2 | 1 | 1 | 2 | 2 | 2 | 1 | 2 |
| Uruguay                  | AMR | 0 | 1 | 0 | 1 | 2 | 0 | 0 | 0 | 2 | 1 | 0 | 1 | 1 | 2 | 1 |
| Afghanistan              | EMR | 0 | 2 | 2 | 2 | 1 | 2 | 2 | 2 | 2 | 0 | 0 | 0 | 2 | 2 | 0 |
| Egypt                    | EMR | 2 | 2 | 1 | 2 | 1 | 2 | 1 | 2 | 0 | 1 | 2 | 2 | 1 | 0 | 1 |
| Iran                     | EMR | 0 | 2 | 2 | 2 | 0 | 2 | 2 | 2 | 2 | 1 | 0 | 0 |   | 2 | 2 |
| Iraq                     | EMR | 0 | 0 | 1 | 1 | 0 | 0 | 0 | 2 | 1 | 1 | 0 | 2 | 2 | 1 | 1 |
| Jordan                   | EMR | 0 | 2 | 2 | 1 | 0 | 0 | 2 | 2 | 1 | 1 | 0 | 2 | 2 | 1 | 1 |
| Oman                     | EMR | 2 | 0 | 2 | 1 | 1 | 0 | 2 | 2 | 1 | 0 | 0 | 2 | 2 | 1 | 0 |
| Pakistan                 | EMR | 2 | 1 | 2 | 2 | 1 | 0 | 2 | 2 | 2 | 0 | 0 | 2 | 2 | 2 | 0 |
| Saudi Arabia             | EMR | 1 | 2 | 2 | 0 | 0 | 2 | 2 | 2 | 0 | 0 | 0 | 0 | 0 | 1 | 0 |
| Somalia                  | EMR | 0 | 2 | 2 | 0 | 0 | 2 | 2 | 2 | 0 | 0 |   | 0 | 2 | 1 | 0 |
| Sudan                    | EMR | 0 | 2 | 2 | 2 | 0 | 2 | 2 | 2 | 2 | 0 | 0 | 0 | 2 | 2 | 0 |
| Syrian Arab Republic     | EMR | 0 | 2 | 0 | 1 | 0 | 0 | 2 | 2 | 0 | 1 | 0 | 2 | 1 | 0 | 1 |
| Tunisia                  | EMR | 0 | 2 | 2 | 0 | 1 | 0 | 0 | 0 | 0 | 0 | 0 | 0 | 1 | 0 | 0 |
| Andorra                  | EUR | 0 | 1 | 0 | 1 | 1 | 2 | 1 | 0 | 1 | 1 | 2 | 2 | 1 | 1 | 2 |
| Armenia                  | EUR | 0 | 1 | 1 | 1 | 0 | 0 | 2 | 1 | 1 | 1 | 0 | 2 | 1 | 1 | 1 |
| Austria                  | EUR | 0 | 0 | 1 | 1 | 1 | 1 | 0 | 2 | 1 | 1 | 1 | 1 | 1 | 1 | 2 |
| Azerbaijan               | EUR | 0 | 1 | 0 | 2 | 2 | 2 | 1 | 0 | 2 | 1 | 2 | 2 | 1 | 2 | 2 |
| Belarus                  | EUR | 2 | 1 | 2 | 1 | 2 | 2 | 2 | 2 | 1 | 1 | 2 | 2 | 2 | 1 | 2 |



|                |     |   |   |   |   |   |   |   |   |   |   |   |   |   |   |   |
|----------------|-----|---|---|---|---|---|---|---|---|---|---|---|---|---|---|---|
| Belgium        | EUR | 1 | 1 | 0 | 1 | 2 | 0 | 1 | 1 | 1 | 1 | 0 | 2 | 2 | 1 | 2 |
| Bulgaria       | EUR | 0 | 1 | 2 | 1 | 1 | 1 | 1 | 1 | 1 | 1 | 1 | 0 | 1 | 1 | 2 |
| Croatia        | EUR | 1 | 1 | 1 | 1 | 2 | 1 | 1 | 1 | 1 | 1 | 1 | 1 | 1 | 1 | 2 |
| Cyprus         | EUR | 2 | 1 | 1 | 1 | 2 | 2 | 1 | 1 | 1 | 1 | 2 | 1 | 1 | 1 | 2 |
| Czech Republic | EUR | 2 | 1 | 1 | 2 | 1 | 2 | 1 | 1 | 2 | 1 | 2 | 2 | 1 | 2 | 1 |
| Denmark        | EUR | 0 | 0 | 1 | 1 | 2 | 1 | 0 | 1 | 1 | 1 | 1 | 2 | 1 | 1 | 2 |
| Estonia        | EUR | 0 | 1 | 1 | 1 | 2 | 2 | 0 | 1 | 1 | 1 | 2 | 2 | 1 | 1 | 2 |
| Finland        | EUR | 2 | 2 | 2 | 1 | 2 | 2 | 2 | 2 | 1 | 1 | 1 | 2 | 2 | 1 | 2 |
| France         | EUR | 1 | 1 | 2 | 1 | 2 | 1 | 1 | 2 | 1 | 1 | 1 | 2 | 2 | 1 | 2 |
| Georgia        | EUR | 0 | 0 | 0 | 1 | 1 | 2 | 0 | 1 | 1 | 1 | 0 | 2 | 2 | 1 | 1 |
| Germany        | EUR | 1 | 1 | 1 | 1 | 2 | 1 | 0 | 1 | 1 | 1 | 0 | 1 | 1 | 1 | 2 |
| Greece         | EUR | 2 | 1 | 0 | 1 | 2 | 0 | 1 | 1 | 1 | 1 | 1 | 2 | 2 | 1 | 2 |
| Hungary        | EUR | 0 | 0 | 1 | 2 | 2 | 0 | 0 | 1 | 2 | 1 | 0 | 2 | 1 | 2 | 2 |
| Iceland        | EUR | 1 | 2 | 2 | 1 | 2 | 1 | 2 | 2 | 1 | 1 | 1 | 2 | 2 | 1 | 2 |
| Ireland        | EUR | 2 | 1 | 2 | 1 | 1 | 1 | 1 | 2 | 1 | 1 | 2 | 2 | 2 | 1 | 1 |
| Israel         | EUR | 2 | 1 | 1 | 1 | 1 | 2 | 1 | 1 | 1 | 1 | 1 | 2 | 2 | 1 | 1 |
| Italy          | EUR | 1 | 1 | 2 | 1 | 2 | 2 | 1 | 2 | 1 | 1 | 2 | 1 | 2 | 1 | 2 |
| Kazakhstan     | EUR | 1 | 1 | 1 | 2 | 1 | 2 | 1 | 2 | 2 | 1 | 1 | 2 | 2 | 1 | 2 |
| Latvia         | EUR | 2 | 1 | 1 | 1 | 2 | 2 | 1 | 1 | 1 | 1 | 1 | 2 | 2 | 1 | 2 |
| Lithuania      | EUR | 2 | 1 | 2 | 1 | 2 | 2 | 1 | 2 | 1 | 1 | 2 | 2 | 2 | 1 | 2 |
| Luxembourg     | EUR | 0 | 1 | 0 | 1 | 1 | 0 | 1 | 1 | 1 | 1 | 0 | 2 | 1 | 1 | 1 |
| Malta          | EUR | 0 | 1 | 2 | 1 | 0 | 0 | 1 | 2 | 1 | 1 | 1 | 2 | 2 | 1 | 1 |

|                     |     |   |   |   |   |   |   |   |   |   |   |   |   |   |   |   |
|---------------------|-----|---|---|---|---|---|---|---|---|---|---|---|---|---|---|---|
| Monaco              | EUR | 0 | 0 | 0 | 1 | 0 | 0 | 0 | 0 | 1 | 1 | 0 | 2 | 0 | 1 | 2 |
| Netherlands         | EUR | 2 | 1 | 1 | 1 | 2 | 1 | 1 | 1 | 1 | 1 | 2 | 2 | 2 | 1 | 2 |
| North Macedonia     | EUR | 1 | 2 | 2 | 1 | 2 | 1 | 2 | 2 | 1 | 1 | 0 | 2 | 2 | 0 | 2 |
| Norway              | EUR | 1 | 2 | 2 | 1 | 2 | 1 | 2 | 2 | 1 | 1 | 1 | 2 | 2 | 1 | 2 |
| Poland              | EUR | 2 | 1 | 1 | 1 | 2 | 1 | 1 | 1 | 1 | 1 | 2 | 2 | 2 | 1 | 1 |
| Portugal            | EUR | 2 | 1 | 1 | 1 | 2 | 2 | 1 | 2 | 1 | 1 | 2 | 2 | 2 | 1 | 2 |
| Republic of Moldova | EUR | 2 | 2 | 2 | 1 | 2 | 2 | 2 | 2 | 1 | 1 | 2 | 1 | 2 | 1 | 2 |
| Romania             | EUR | 2 | 1 | 1 | 2 | 2 | 0 | 2 | 1 | 2 | 1 | 0 | 2 | 2 | 0 | 1 |
| Russian Federation  | EUR | 1 | 1 | 1 | 2 | 0 | 1 | 1 | 2 | 1 | 1 | 2 | 2 | 2 | 1 | 2 |
| San Marino          | EUR | 1 | 1 | 0 | 1 | 0 | 1 | 1 | 0 | 1 | 0 | 1 | 0 | 1 | 1 | 0 |
| Serbia              | EUR | 0 | 1 | 1 | 1 | 2 | 0 | 1 | 1 | 1 | 1 | 1 | 2 | 1 | 1 | 1 |
| Slovakia            | EUR | 1 | 1 | 1 | 2 | 0 | 2 | 0 | 1 | 2 | 1 | 2 | 2 | 1 | 2 | 2 |
| Slovenia            | EUR | 2 | 0 | 1 | 1 | 2 | 1 | 0 | 2 | 1 | 1 | 1 | 2 | 1 | 1 | 2 |
| Spain               | EUR | 2 | 1 | 1 | 1 | 2 | 2 | 1 | 1 | 1 | 1 | 2 | 2 | 1 | 1 | 2 |
| Sweden              | EUR | 2 | 1 | 2 | 1 | 2 | 1 | 0 | 2 | 1 | 1 | 1 | 2 | 2 | 1 | 2 |
| Switzerland         | EUR | 1 | 1 | 1 | 1 | 2 | 1 | 1 | 0 | 1 | 1 | 1 | 1 | 1 | 1 | 2 |
| Tajikistan          | EUR | 1 | 2 | 1 | 1 | 1 | 1 | 2 | 1 | 1 | 1 | 2 | 2 | 2 | 1 | 2 |
| Turkey              | EUR | 0 | 1 | 1 | 1 | 0 | 0 | 1 | 2 | 1 | 1 | 1 | 2 | 2 | 1 | 2 |
| Turkmenistan        | EUR | 2 | 2 | 2 | 2 | 1 | 0 | 2 | 1 | 1 | 1 | 1 | 2 | 2 | 1 | 1 |
| Ukraine             | EUR | 0 | 1 | 1 | 1 | 2 | 0 | 1 | 1 | 1 | 0 | 1 | 2 | 1 | 1 | 0 |
| United Kingdom      | EUR | 1 | 2 | 1 | 1 | 1 | 1 | 1 | 1 | 1 | 1 | 1 | 2 | 0 | 1 | 2 |

|                                        |      |   |   |   |   |   |   |   |   |   |   |   |   |   |   |   |
|----------------------------------------|------|---|---|---|---|---|---|---|---|---|---|---|---|---|---|---|
| Bangladesh                             | SEAR | 0 | 2 | 0 | 2 | 1 | 1 | 2 | 0 | 2 | 1 | 1 | 2 | 2 | 2 | 1 |
| Bhutan                                 | SEAR | 0 | 1 | 1 | 1 | 0 | 2 | 1 | 2 | 1 | 1 | 2 | 1 | 2 | 1 | 1 |
| India                                  | SEAR | 0 | 1 | 2 | 1 | 2 | 1 | 1 | 2 | 1 | 1 | 1 | 0 | 1 | 1 | 1 |
| Indonesia                              | SEAR | 0 | 2 | 0 | 2 | 1 | 1 | 1 | 1 | 0 | 1 | 1 | 2 | 0 | 0 | 1 |
| Myanmar                                | SEAR | 0 | 1 | 2 | 1 | 2 | 0 | 1 | 2 | 1 | 1 | 0 | 2 | 1 | 1 | 1 |
| Sri Lanka                              | SEAR | 0 | 1 | 2 | 1 | 1 | 1 | 1 | 2 | 1 | 1 | 2 | 2 | 2 | 1 | 2 |
| Thailand                               | SEAR | 2 | 1 | 2 | 1 | 2 | 2 | 1 | 2 | 1 | 1 | 2 | 2 | 2 | 1 | 2 |
| Australia                              | WPR  | 2 | 0 | 1 | 1 | 2 | 2 | 1 | 0 | 1 | 1 | 2 | 1 | 1 | 1 | 2 |
| Cambodia                               | WPR  | 1 | 1 | 0 | 1 | 1 | 2 | 1 | 0 | 1 | 1 | 2 | 0 | 0 | 1 | 1 |
| China                                  | WPR  | 0 | 1 | 0 | 1 | 0 | 0 | 1 | 0 | 1 | 1 | 0 | 2 | 0 | 0 | 1 |
| Cook Islands                           | WPR  | 0 | 2 | 2 | 1 | 1 | 2 | 1 | 0 | 1 | 0 | 0 | 2 | 1 | 1 | 0 |
| Japan                                  | WPR  | 2 | 1 | 0 | 1 | 2 | 2 | 1 | 0 | 1 | 1 | 2 | 2 | 1 | 1 | 1 |
| Lao People's<br>Democratic<br>Republic | WPR  | 2 | 1 | 1 | 1 | 1 | 1 | 1 | 1 | 1 | 0 | 1 | 2 | 1 | 1 | 0 |
| Malaysia                               | WPR  | 2 | 1 | 1 | 1 | 2 | 1 | 1 | 2 | 1 | 1 | 2 | 2 | 2 | 1 | 2 |
| Mongolia                               | WPR  | 2 | 2 | 1 | 1 | 2 | 0 | 2 | 1 | 1 | 1 | 1 | 2 | 2 | 1 | 1 |
| New Zealand                            | WPR  | 1 | 1 | 1 | 1 | 2 | 1 | 1 | 1 | 1 | 1 | 1 | 2 | 2 | 1 | 2 |
| Philippines                            | WPR  | 0 | 1 | 1 | 1 | 0 | 2 | 2 | 1 | 1 | 1 | 1 | 2 | 1 | 1 | 1 |
| Republic of Korea                      | WPR  | 1 | 1 | 0 | 1 | 2 | 1 | 1 | 0 | 1 | 1 | 2 | 2 | 1 | 1 | 2 |
| Singapore                              | WPR  | 0 | 1 | 0 | 1 | 2 | 1 | 1 | 0 | 1 | 1 | 1 | 2 | 2 | 1 | 2 |
| Vietnam                                | WPR  | 0 | 1 | 1 | 2 | 0 | 2 | 1 | 1 | 2 | 1 | 1 | 2 | 1 | 2 | 2 |

**Abbreviations:** AFR; African Region, AMR; Region of the Americas, EMR; Eastern Mediterranean Region, EUR; European Region, SEAR; South-East Asia Region, WPR; Western Pacific Region.

**Supplementary Table 4.** *The change of API (%) between 2010 – 2020 for each country*

| Country                          | WHO region | API Change (2010–2019, relative, %) |
|----------------------------------|------------|-------------------------------------|
| Angola                           | AFR        | 77.3                                |
| Benin                            | AFR        | 40.4                                |
| Botswana                         | AFR        | -22.8                               |
| Burundi                          | AFR        | 370.0                               |
| Cabo Verde                       | AFR        | 149.1                               |
| Central African Republic         | AFR        | -23.4                               |
| Chad                             | AFR        | 321.0                               |
| Congo                            | AFR        | -18.6                               |
| Côte d'Ivoire                    | AFR        | 40.5                                |
| Democratic Republic of the Congo | AFR        | -19.9                               |
| Ethiopia                         | AFR        | 68.8                                |
| Ghana                            | AFR        | 28.2                                |
| Guinea                           | AFR        | -67.0                               |
| Kenya                            | AFR        | 33.7                                |
| Liberia                          | AFR        | 19.2                                |
| Mali                             | AFR        | -57.0                               |
| Mozambique                       | AFR        | 97.3                                |
| Nigeria                          | AFR        | 3.2                                 |
| Rwanda                           | AFR        | 68.9                                |
| Senegal                          | AFR        | -26.5                               |
| Seychelles                       | AFR        | 3.6                                 |
| Sierra Leone                     | AFR        | 100.5                               |
| South Africa                     | AFR        | -37.1                               |
| Uganda                           | AFR        | -29.4                               |
| United Republic of Tanzania      | AFR        | 5.7                                 |
| Zambia                           | AFR        | 21.4                                |
| Zimbabwe                         | AFR        | -0.6                                |
| Antigua and Barbuda              | AMR        | 841.9                               |

|                                  |     |       |
|----------------------------------|-----|-------|
| Argentina                        | AMR | 7.5   |
| Bahamas                          | AMR | -13.8 |
| Barbados                         | AMR | 242.4 |
| Belize                           | AMR | 150.3 |
| Bolivia                          | AMR | 17.2  |
| Brazil                           | AMR | -21.5 |
| Canada                           | AMR | 11.3  |
| Chile                            | AMR | 20.2  |
| Colombia                         | AMR | -10.0 |
| Costa Rica                       | AMR | 24.4  |
| Cuba                             | AMR | -43.1 |
| Dominica                         | AMR | 188.0 |
| Dominican Republic               | AMR | 18.9  |
| Ecuador                          | AMR | 47.5  |
| El Salvador                      | AMR | 107.4 |
| Grenada                          | AMR | 135.5 |
| Guatemala                        | AMR | 160.5 |
| Guyana                           | AMR | -19.5 |
| Honduras                         | AMR | 16.2  |
| Jamaica                          | AMR | 18.9  |
| Mexico                           | AMR | -31.3 |
| Nicaragua                        | AMR | 6.0   |
| Panama                           | AMR | 73.7  |
| Paraguay                         | AMR | 253.0 |
| Peru                             | AMR | 25.7  |
| Saint Kitts and Nevis            | AMR | 14.0  |
| Saint Lucia                      | AMR | 100.2 |
| Saint Vincent and the Grenadines | AMR | -52.5 |
| Suriname                         | AMR | 14.0  |
| United States of America         | AMR | -10.0 |

|                      |     |       |
|----------------------|-----|-------|
| Uruguay              | AMR | 10.9  |
| Afghanistan          | EMR | -35.6 |
| Egypt                | EMR | -8.2  |
| Iran                 | EMR | 2.0   |
| Iraq                 | EMR | 59.0  |
| Jordan               | EMR | 48.5  |
| Oman                 | EMR | -21.2 |
| Pakistan             | EMR | -34.8 |
| Saudi Arabia         | EMR | -69.5 |
| Somalia              | EMR | 57.5  |
| Sudan                | EMR | -28.7 |
| Syrian Arab Republic | EMR | 65.9  |
| Tunisia              | EMR | -42.5 |
| Andorra              | EUR | 116.0 |
| Armenia              | EUR | 11.4  |
| Austria              | EUR | 97.1  |
| Azerbaijan           | EUR | 48.2  |
| Belarus              | EUR | -7.2  |
| Belgium              | EUR | -3.0  |
| Bulgaria             | EUR | 8.5   |
| Croatia              | EUR | -5.9  |
| Cyprus               | EUR | -5.7  |
| Czech Republic       | EUR | -5.5  |
| Denmark              | EUR | 21.2  |
| Estonia              | EUR | 9.8   |
| Finland              | EUR | -7.5  |
| France               | EUR | -7.5  |
| Georgia              | EUR | 141.1 |
| Germany              | EUR | -16.9 |
| Greece               | EUR | 2.2   |

|                     |     |       |
|---------------------|-----|-------|
| Hungary             | EUR | 6.7   |
| Iceland             | EUR | -0.6  |
| Ireland             | EUR | 5.0   |
| Israel              | EUR | -6.7  |
| Italy               | EUR | 10.3  |
| Kazakhstan          | EUR | 20.5  |
| Latvia              | EUR | -16.2 |
| Lithuania           | EUR | -7.2  |
| Luxembourg          | EUR | 50.8  |
| Malta               | EUR | 50.3  |
| Monaco              | EUR | 136.4 |
| Netherlands         | EUR | -10.0 |
| North Macedonia     | EUR | -26.5 |
| Norway              | EUR | -0.6  |
| Poland              | EUR | -19.0 |
| Portugal            | EUR | -10.0 |
| Republic of Moldova | EUR | 10.4  |
| Romania             | EUR | -44.6 |
| Russian Federation  | EUR | 37.6  |
| San Marino          | EUR | -30.0 |
| Serbia              | EUR | -9.8  |
| Slovakia            | EUR | 23.3  |
| Slovenia            | EUR | -10.9 |
| Spain               | EUR | -15.7 |
| Sweden              | EUR | -13.5 |
| Switzerland         | EUR | -5.9  |
| Tajikistan          | EUR | 33.1  |
| Turkey              | EUR | 58.6  |
| Turkmenistan        | EUR | 12.6  |
| Ukraine             | EUR | -27.2 |



|                                  |      |       |
|----------------------------------|------|-------|
| United Kingdom                   | EUR  | -5.7  |
| Bangladesh                       | SEAR | 151.3 |
| Bhutan                           | SEAR | 72.3  |
| India                            | SEAR | -32.7 |
| Indonesia                        | SEAR | 52.9  |
| Myanmar                          | SEAR | -20.1 |
| Sri Lanka                        | SEAR | 66.7  |
| Thailand                         | SEAR | -7.2  |
| Australia                        | WPR  | 7.5   |
| Cambodia                         | WPR  | -26.1 |
| China                            | WPR  | -5.5  |
| Cook Islands                     | WPR  | -4.4  |
| Japan                            | WPR  | -8.1  |
| Lao People's Democratic Republic | WPR  | -30.4 |
| Malaysia                         | WPR  | -10.0 |
| Mongolia                         | WPR  | -20.1 |
| New Zealand                      | WPR  | -10.5 |
| Philippines                      | WPR  | 31.0  |
| Republic of Korea                | WPR  | 11.4  |
| Singapore                        | WPR  | 42.6  |
| Vietnam                          | WPR  | 53.6  |

**Abbreviations:** AFR; African Region, AMR; Region of the Americas, EMR; Eastern Mediterranean Region, EUR; European Region, SEAR; South-East Asia Region, WPR; Western Pacific Region.

**Supplementary Table 5.** Ten countries with the lowest AUD prevalence and alcohol-related cancer, liver, and cardiovascular mortality indicators in 2020, and overlap with top API performers.

| AUD prevalence (%)   | HCC incidence (rate)             | HCC incidence, alcohol attributable (rate) | HCC mortality (rate)             | Cirrhosis mortality (rate) | Cardiovascular mortality (rate) |
|----------------------|----------------------------------|--------------------------------------------|----------------------------------|----------------------------|---------------------------------|
| Guinea               | Sri Lanka                        | Sao Tome and Principe                      | Sri Lanka                        | Ireland                    | Benin                           |
| Syrian Arab Republic | Sudan                            | Burundi                                    | El Salvadore                     | Israel                     | Peru                            |
| Benin                | Belize                           | Iran                                       | Oman                             | Oman                       | Nicaragua                       |
| Iraq                 | El Salvador                      | Sudan                                      | Belize                           | Norway                     | Burundi                         |
| Nigeria              | Democratic Republic of the Congo | Democratic Republic of the Congo           | Democratic Republic of the Congo | Jamaica                    | Nigeria                         |
| Egypt                | Argentina                        | Oman                                       | Argentina                        | New Zealand                | Mali                            |
| Sudan                | Sao Tome and Principe            | Ethiopia                                   | Sao Tome and Principe            | Jordan                     | Kenya                           |
| Afghanistan          | Burundi                          | Saudi Arabia                               | Burundi                          | Iceland                    | Somalia                         |
| Chad                 | Ethiopia                         | Afghanistan                                | Ethiopia                         | Singapore                  | Ethiopia                        |
| Mali                 | Jordan                           | Jordan                                     | Jordan                           | Cook Island                | Uganda                          |

## SUPPLEMENTARY FIGURES

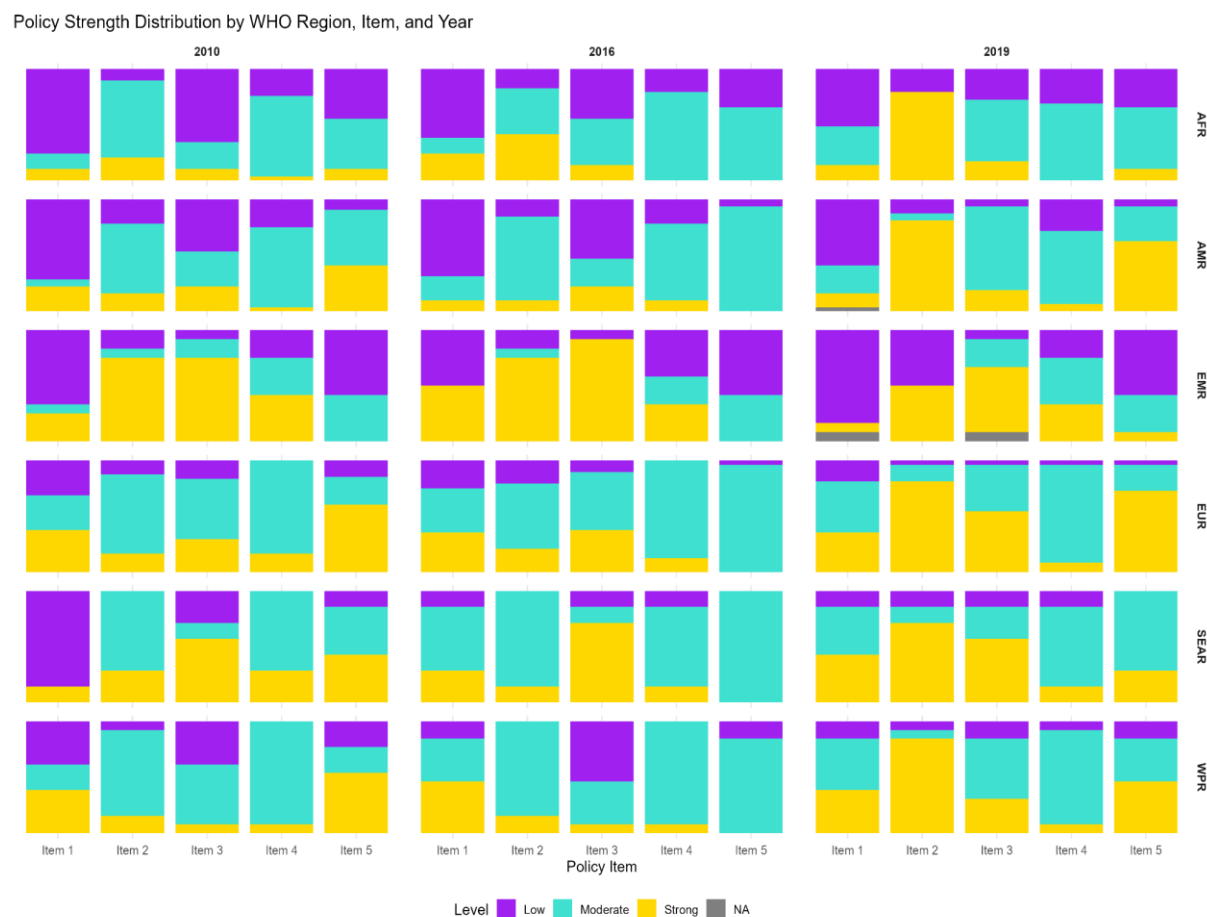

**Supplementary Figure 1.** Policy Distribution by WHO region, items and year. Item 1. National alcohol policy frameworks; Item 2. Controls on production, pricing and taxation; Item 3. Restrictions on marketing and physical availability; Item 4. Drink-driving countermeasures; Item 5. Surveillance and monitoring systems.

## Alcohol Consumption per Capita, Worldwide (2020)

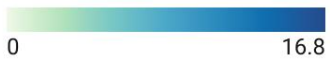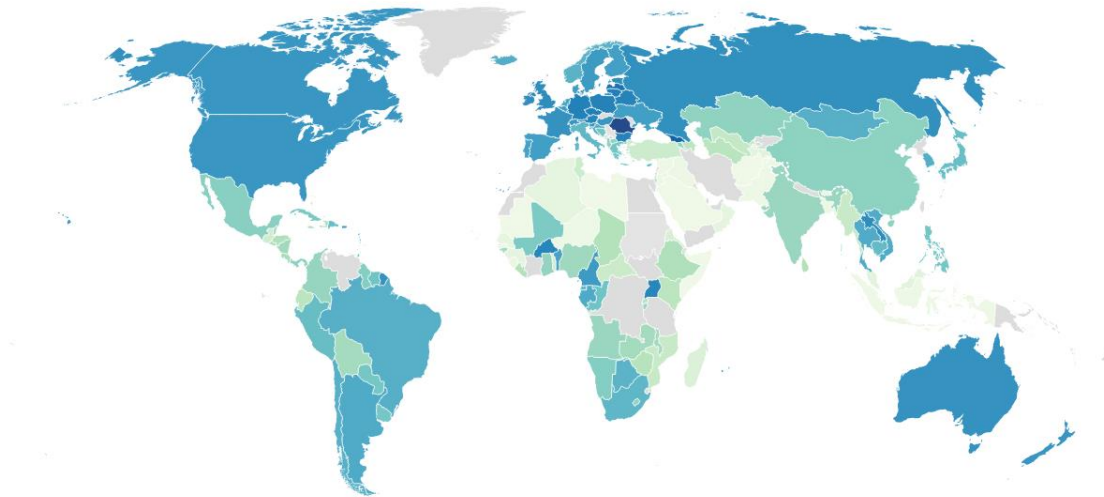

**Supplementary Figure 2.** Alcohol Consumption per Capita (liters), worldwide (2020).

### Top 10 Countries by % API Increase 2010→2019

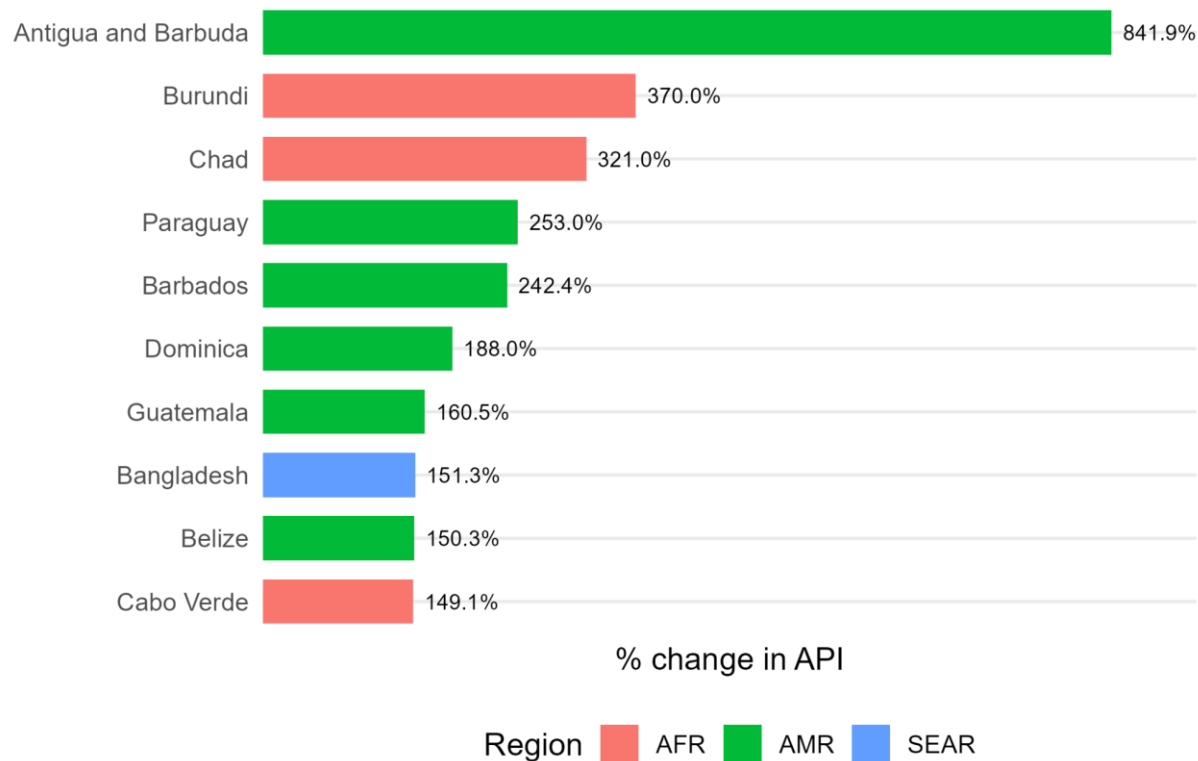

**Supplementary Figure 3.** Top 10 countries by relative API increase between 2010 and 2019.

**Abbreviations:** AFR; African Region, AMR; Region of the Americas, EMR; Eastern Mediterranean Region, EUR; European Region, SEAR; South-East Asia Region, WPR; Western Pacific Region.

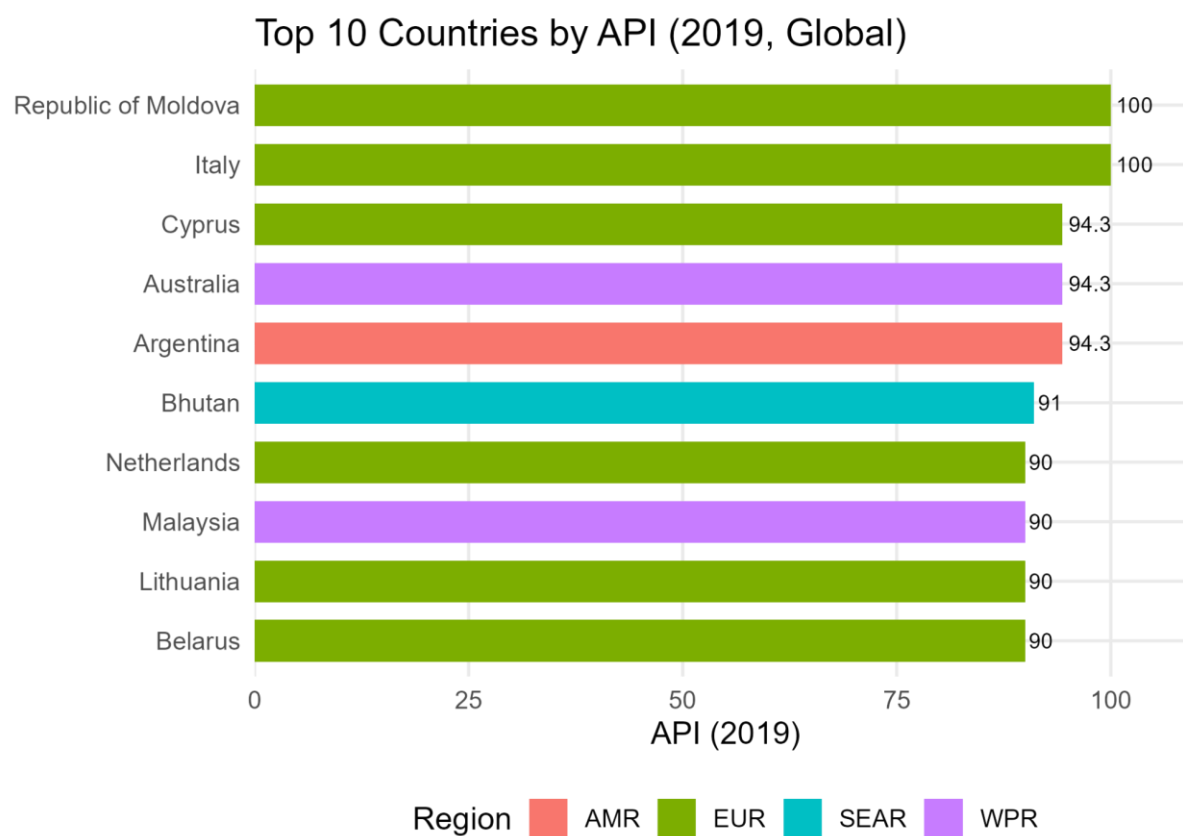

**Supplementary Figure 4.** Top 10 countries by absolute API level in 2019.

**Abbreviations:** AFR; African Region, AMR; Region of the Americas, EMR; Eastern Mediterranean Region, EUR; European Region, SEAR; South-East Asia Region, WPR; Western Pacific Region.
